# Supplementary figures and images for: Design and Validation of an Automated Process for the Expansion of Peripheral Blood‐Derived CD34+ Cells for Clinical Use After Myocardial Infarction
Source: PubMed Central journal article supplement — Stem Cells Transl Med. 2019 Apr 29;8(8):822–32. doi: 10.1002/sctm.17-0277 (PMC6646685; doi:10.1002/sctm.17-0277), 2019-04-29

Figure S1

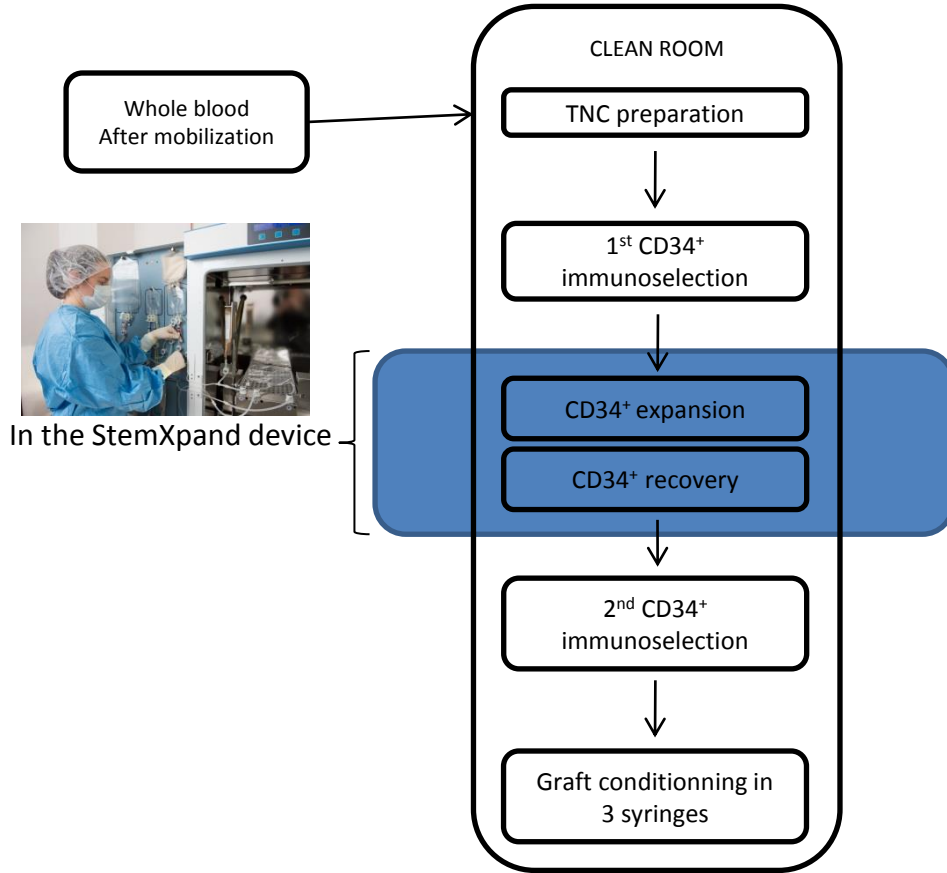

Supplement: SCT3-8-822-s001.pdf [file SCT3-8-822-s001.pdf]

Figure S2

↑  
Top

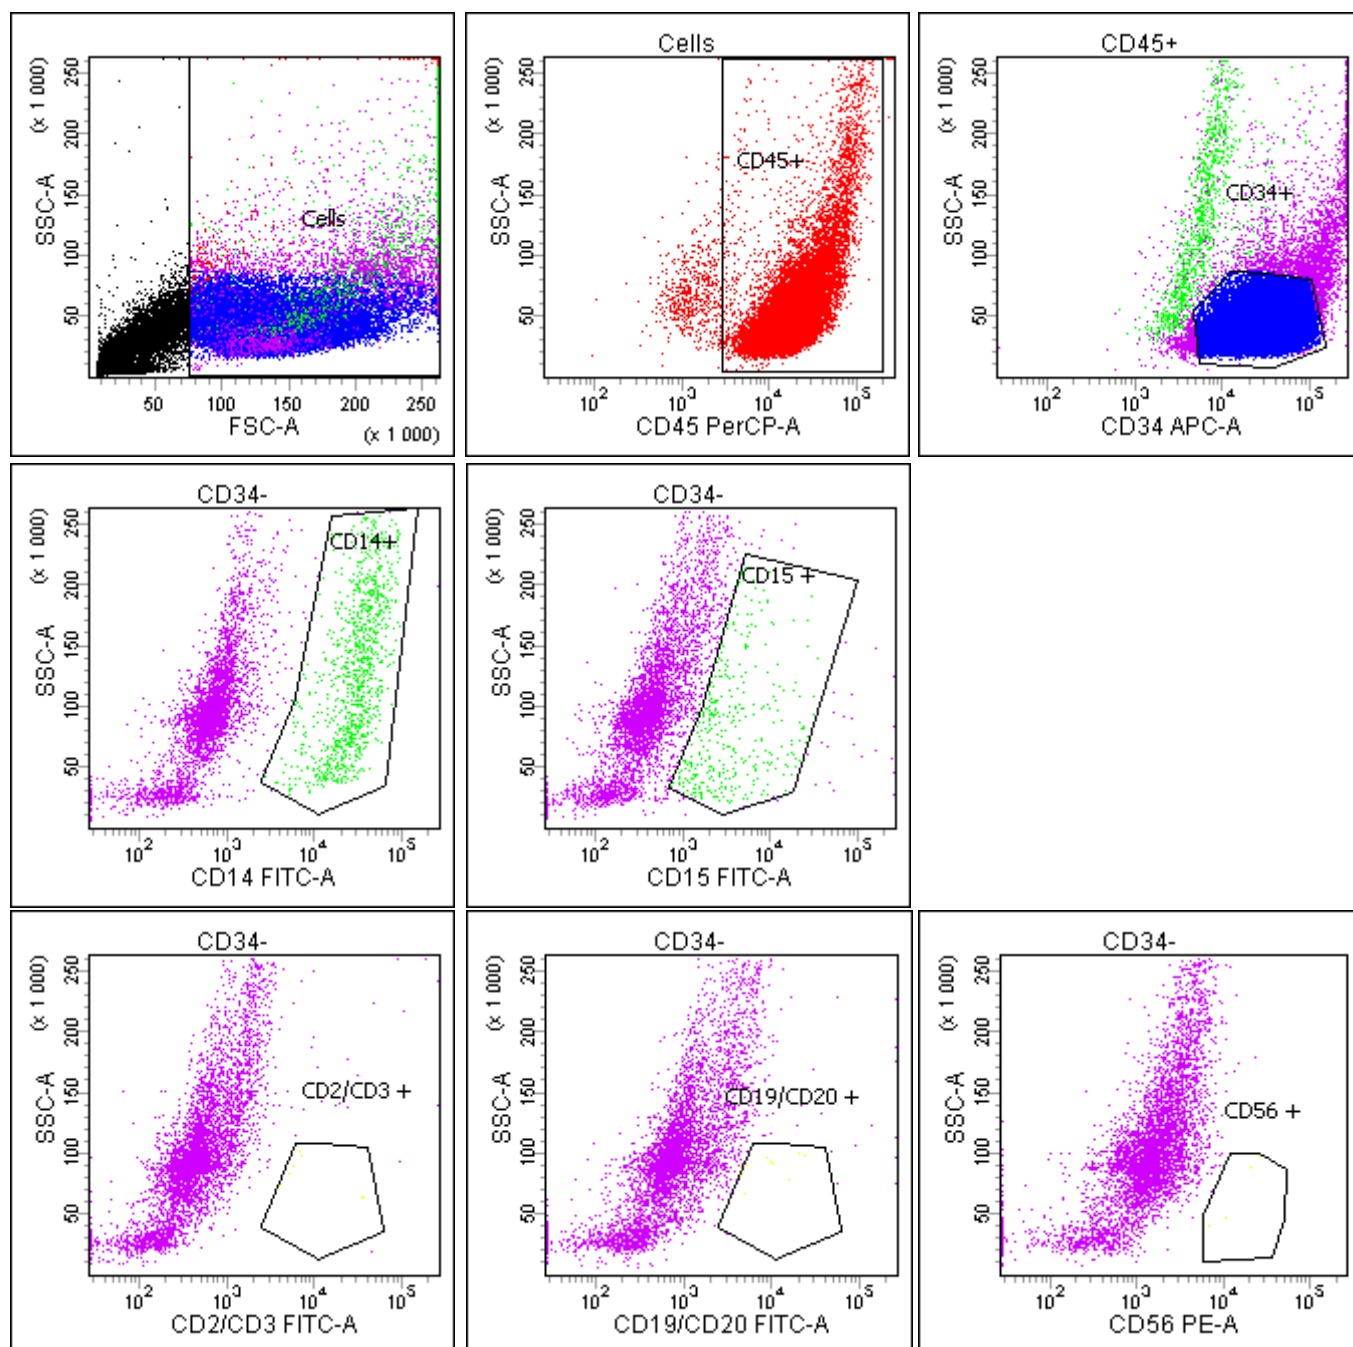

Supplement: SCT3-8-822-s002.pdf [file SCT3-8-822-s002.pdf]

Figure S3

↑  
Top

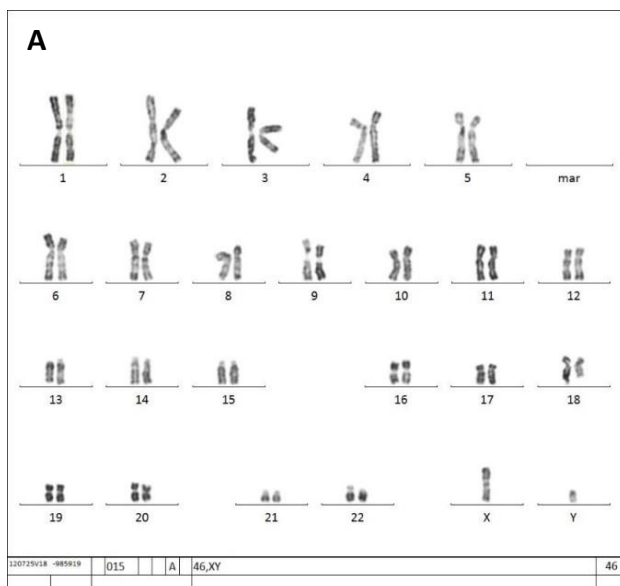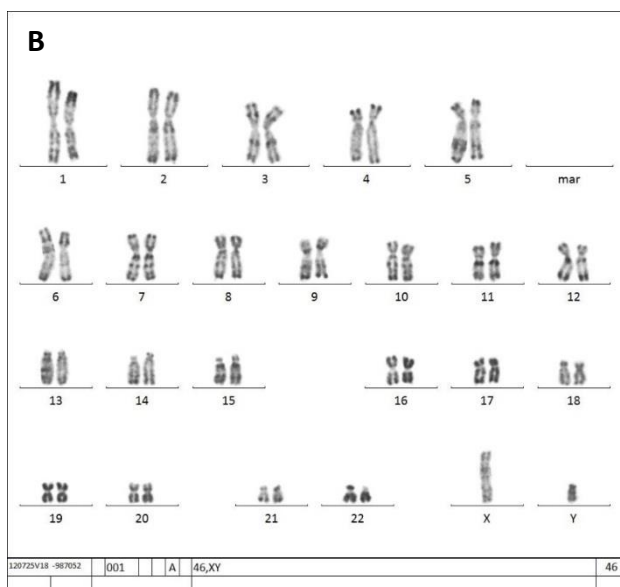

Supplement: SCT3-8-822-s003.pdf [file SCT3-8-822-s003.pdf]
